# Supplementary material for: The mechanism of mammalian proton-coupled peptide transporters
Source: eLife journal article supplement (doi:10.7554/elife.96507), 2024-04-16

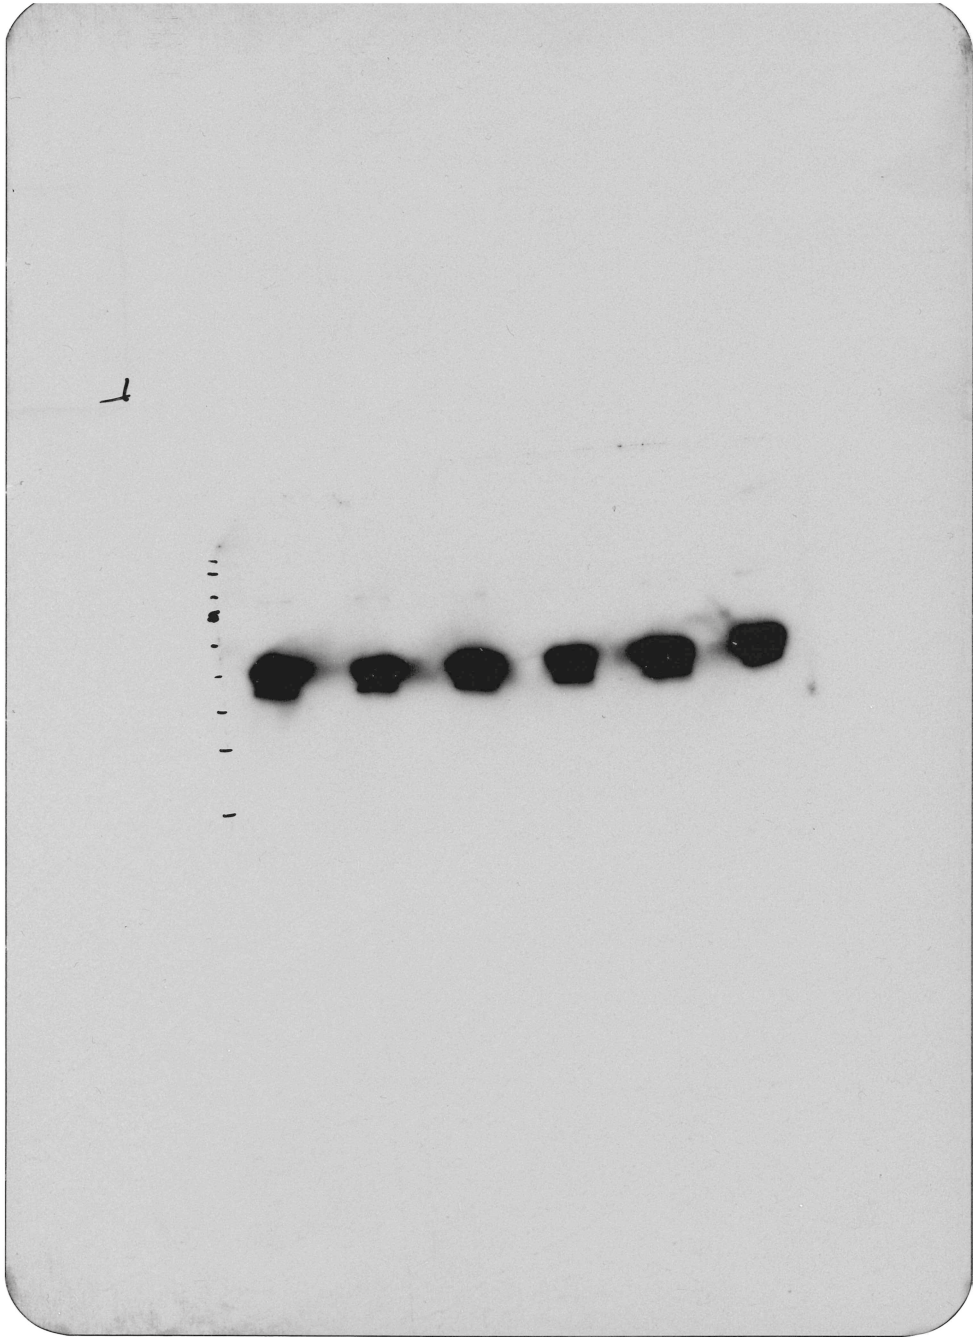

Supplement: fig7-figsupp1-data1 [file elife-96507-fig7-figsupp1-data1-v1.pdf]
